# Supplementary material
Source: MDPI journal article supplement (https://www.mdpi.com/2075-471X/8/4/25)
Supplement: s1 [file s1]

## Sheet: Master
Category	Instrument	Article(s)	Race	Religion	Nationality	Ethnic Origin	Social Origin	Political Opinion	Economic Status	Gender	Sex	Sexual Orientation	Culture	Colour	Language	Age	Birth	Property	Disability	Other Status	Citizenship	Membership of a Particular Social Group	Marital Status	Class	Descent	Association with a National Miority	National Extraction	Indigenous Origin	Education	Health	Genetic Heritage
TCL	1979 International Convention Against the Taking of Hostages	9	X	X	X	X		X
TCL	1988 Convention for the Suppression of Unlawful Acts of Violence against the Safety of Maritime Navigation	N/A
TCL	1997 International Convention for the Suppression of Terrorist Bombings	12	X	X	X	X		X
TCL	1999 International Convention for the Suppression of the Financing of Terrorism	15	X	X	X	X		X
TCL	2005 International Convention for the Suppression of Acts of Nuclear Terrorism	16	X	X	X	X		X
TCL	2010 Protocol Supplementary to the Convention for the Suppression of Unlawful Seizure of Aircraft	XIII	X	X	X	X		X		X
TCL	2005 Protocol to the Convention for the Suppression of Unlawful Acts against the Safety of Maritime Navigation	10(3)	X	X	X	X		X		X
TCL	1988 United Nations Convention against Illicit Traffic in Narcotic Drugs and Psychotropic Substances	6(6)	X	X	X			X
TCL	2000 United Nations Convention against Transnational Organized Crime	14	X	X	X	X		X			X
TCL	2003 United Nations Convention against Corruption	15	X	X	X	X		X			X
TCL	2002 Inter-American Convention Against Terrorism	14	X	X	X	X		X
TCL	2005 Convention on the Prevention of Terrorism	21(1)	X	X	X	X		X
TCL	1999 Organization for African Unity, Convention on the Prevention and Combatting of Terrorism	N/A
TCL	1998 Arab Convention for the Suppression of Terrorism	N/A
TCL	1987 South Asian Association for Regional Cooperation, Regional Convention on Suppression of Terrorism	N/A
TCL	1970 Convention for the Suppression of Unlawful Seizure of Aircraft	N/A
TCL	1988 Protocol for the Suppression of Unlawful Acts of Violence at Airports Serving International Civil Aviation	N/A
TCL	2010 Convention on the Suppression of Unlawful Acts Relating to International Civil Aviation	14	X	X	X	X		X		X
TCL	1973 Convention on the Prevention and Punishment of Crimes Against Internationally Protected Persons, including Diplomatic Agents	N/A
TCL	1988 Protocol for the Suppression of Unlawful Acts against the Safety of Fixed Platforms Located on the Continental Shelf	N/A
TCL	1994 Convention on the Safety of United Nations and Associated Personnel	N/A
TCL	2000 Protocol to Prevent, Suppress and Punish Trafficking in Persons, Especially Women and Children, supplementing the United Nations Convention against Transnational Organized Crime	N/A
TCL	2000 Protocol against the Smuggling of Migrants by Land, Sea and Air, supplementing the United Nations Convention against Transnational Crime	N/A
TCL	2001 Protocol against the Illicit Manufacturing of and Trafficking in Firearms, their Parts and Components and Ammunition, supplementing the United Nations Convention against Transnational Organized Crime	N/A
TCL	1961 Single Convention on Narcotic Drugs	N/A
TCL	1971 United Nations Convention on Psychotropic Substances	N/A
TCL	1972 Protocol Amending the Single Convention on Narcotic Drugs	N/A
TCL	1956 Supplementary Convention on the Abolition of Slavery, the Slave Trade, and Institutions and Practices Similar to Slavery	N/A
TCL	1973 International Convention on the Suppression and Punishment of the Crime of Apartheid	Preamble	X	X	X						X			X	X
TCL	2000 Optional Protocol to the Convention on the Rights of the Child on the Sale of Children, Child Prostitution and Child Pornography	N/A
TCL	2001 Convention on Cybercrime (Budapest Convention)	N/A
TCL	2003 Additional Protocol to the Convention on Cybercrime, concerning the Criminalisation of Acts of a Racist and Xenophobic Nature Committed through Computer Systems	4(1), 5(1)	X	X	X	X								X											X
TCL	1982 United Nations Convention on the Law of the Sea	N/A
IHL	Geneva Convention for the Amelioration of the Condition of the Wounded and Sick in Armed Forces in the Field of 12 August 1949 (Geneva Convention I)	3, 12, 31	X	X	X			X	X		X			X			X			X
IHL	Geneva Convention for the Amelioration of the Condition of Wounded, Sick and Shipwrecked Members of Armed Forces at Sea of 12 August 1949 (Geneva Convention II)	3, 12	X	X	X			X	X		X			X			X			X
IHL	Geneva Convention Relative to the Treatment of Prisoners of War of 12 August 1949 (Geneva Convention III)	3, 16	X	X	X			X	X		X			X			X			X
IHL	Geneva Convention Relative to the Protection of Civilian Persons in Times of War of 12 August 1949 (Geneva Convention IV)	3, 13, 27	X	X	X			X	X		X			X			X			X
IHL	Protocol Additional to the Geneva Conventions of 12 August 1949, and Relating to the Protection of Victims of International Armed Conflicts (Protocol I) of 8 June 1977 (Additional Protocol 1)	9, 75	X	X	X		X	X	X		X			X	X		X			X
IHL	Protocol Additional to the Geneva Conventions of 12 August 1949, and Relating to the Protection of Victims of Non-International Armed Conflicts (Protocol II) of 8 June 1977 (Additional Protocol II)	2	X	X	X		X	X	X		X			X	X		X			X
ICL	1945 Charter of the International Military Tribunal (Nuremberg Charter)	6(c)	X	X				X
ICL	1946 Charter of the International Military Tribunal for the Far East (Tokyo Tribunal)	5(c)	X					X
ICL	1949 Convention on the Protection and Punishment of the Crime of Genocide (Genocide Convention)	2	X	X	X	X
ICL	1998 Rome Statute of the International Criminal Court (Rome Statute)	6, 7(1)(h), 21	X	X	X	X	X	X	X	X			X	X	X	X	X			X
ICL	1994 Statute of the International Criminal Tribunal for the Former Yugoslavia (ICTY Statute)	4(2), 5(h)	X	X	X	X		X
ICL	1994 Statute of the International Tribunal for Rwanda (ICTR Statute)	2, 3(h)	X	X	X	X		X
ICL	2002 Statute of the Special Court for Sierra Leone (SCSL Statute)	2(h)	X	X		X		X
ICL	2001 Law on the Establishment of the Extraordinary Chambers in the Courts of Cambodia for the Prosecution of Crimes Committed During the Period of Democratic Kampuchea (ECCC Statute)	4,5	X	X	X	X		X
ICL	2014 Protocol on Amendments to the Protocol on the Statute of the African Court of Justice and Human Rights	28(B), 28(C)	X	X	X	X		X		X			X							X
IHRL	1945 Charter of the United Nations	1(3), 13(b), 55(c), 76(c)	X	X							X				X
IHRL	1948 Universal Declaration for Human Rights	2	X	X	X		X	X			X			X	X		X	X		X
IHRL	1966 International Covenant on Civil and Political Rights	2(1), 4(1), 24(1), 26	X	X	X		X	X			X			X	X		X	X		X
IHRL	1966 International Covenant on Economic, Social and Cultural Rights	2(2)	X	X	X		X	X			X			X	X		X	X		X
IHRL	1966 International Convention on the Elimination of All Forms of Racial Discrimination	Preamble, 1(1)	X	X	X	X					X			X	X										X
IHRL	1984 Convention Against Torture and Other Cruel, Inhuman or Degrading Treatment or Punishment	N/A
IHRL	2006 Convention for the Protection of All Persons from Enforced Disappearance	13(7)	X	X	X	X		X			X											X
IHRL	1979 Convention on the Elimination of All Forms of Discrimination Against Women	N/A
IHRL	1989 Convention on the Rights of the Child	Preamble, 2(1)	X	X	X	X	X	X			X			X	X		X	X	X	X
IHRL	1990 Convention on the Protection of the Rights of All Migrant Workers and Members of their Families	1(1), 7	X	X	X	X	X	X	X		X			X	X	X	X	X		X			X
IHRL	2006 Convention on the Rights of Persons with Disabilities	Preamble (p)	X	X	X	X	X	X			X			X	X	X	X	X		X								X
IHRL	1958 Convention concerning Discrimination in Respect of Employment and Occupation	Preamble, 1(a)	X	X			X	X			X			X													X
IHRL	1948 Freedom of Association and Protection of the Right to Organise Convention (No. 87)	N/A
IHRL	1949 Right to Organise and Collective Bargaining Convention (No. 98)	N/A
IHRL	1930 Forced Labour Convention (No. 29)	N/A
IHRL	1957 Abolition of Forced Labour Convention (No. 105)	1	X	X	X		X
IHRL	1973 Minimum Age Convention (No. 138)	N/A
IHRL	1999 Worst Forms of Child Labour Convention (No. 182)	N/A
IHRL	1951 Equal Remuneration Convention (No. 100)	1									X
IHRL	1981 African Charter on Human and Peoples’ Rights (Banjul Charter)	Preamble, 2	X	X	X	X	X	X	X		X			X	X		X			X
IHRL	1969 Convention Governing the Specific Aspects of Refugee Problems	I(1), IV	X	X	X			X														X
IHRL	2003 Protocol to the African Charter on Human and People’s Rights on the Rights of Women in Africa	Preamble	X	X	X	X	X	X	X		X			X	X		X			X
IHRL	1990 African Charter on the Rights and Welfare of the Child	3	X	X	X	X	X	X	X		X			X	X		X			X
IHRL	2009 African Union Convention on the Protection and Assistance of Internally Displaced Persons in Africa	N/A
IHRL	1969 American Convention on Human Rights	1(1), 13(5), 22(8), 27(1)	X	X	X		X	X	X		X			X	X		X			X
IHRL	1988 Additional Protocol to the American Convention on Human Rights in the Area of Economic, Social and Cultural Rights	3	X	X	X		X	X	X		X			X	X		X			X
IHRL	1990 Protocol to the American Convention on Human Rights to Abolish the Death Penalty	N/A
IHRL	1985 Inter-American Convention to Prevent and Punish Torture	N/A
IHRL	1994 Inter-American Convention on Forced Disappearance	N/A
IHRL	1994 Inter-American Convention on the Prevention, Punishment and Eradication of Violence Against Women	Preamble	X	X		X			X				X			X								X					X
IHRL	1999 Inter-American Convention on the Elimination of All Forms of Discrimination against Persons with Disabilities	N/A
IHRL	1994 Arab Charter of Human Rights	2	X	X	X		X	X	X	X	X			X	X		X			X
IHRL	2012 ASEAN Human Rights Declaration	2	X	X	X		X	X	X	X					X	X	X		X	X
IHRL	2007 ASEAN Declaration on the Protection and Promotion of the Rights of Migrant Workers	N/A
IHRL	2013 ASEAN Declaration on the Elimination of Violence against Women and Elimination of Violence against Children	N/A
IHRL	1950 European Convention for the Protection of Human Rights and Fundamental Freedoms (European Convention of Human Rights)	14	X	X	X		X	X			X			X	X		X	X		X						X
IHRL	1952 Protocol 1 to the European Convention for Human Rights and Fundamental Freedoms	N/A
IHRL	1963 Protocol 4 to the European Convention for the Protection of Human Rights and Fundamental Freedoms	N/A
IHRL	1983 Protocol 6 to the European Convention for the Protection of Human Rights and Fundamental Freedoms	N/A
IHRL	1984 Protocol 7 to the European Convention for the Protection of Human Rights and Fundamental Freedoms	N/A
IHRL	1994 Protocol 11 to the European Convention for the Protection of Human Rights and Fundamental Freedoms	N/A
IHRL	2000 Protocol 12 to the European Convention for the Protection of Human Rights and Fundamental Freedoms	1	X	X	X		X	X			X			X	X		X	X		X						X
IHRL	2002 Protocol 13 to the European Convention for the Protection of Human Rights and Fundamental Freedoms	N/A
IHRL	2004 Protocol 14 to the European Convention for the Protection of Human Rights and Fundamental Freedoms	N/A
IHRL	2013 Protocol 15 to the European Convention for the Protection of Human Rights and Fundamental Freedoms	N/A
IHRL	2013 Protocol 16 to the European Convention for the Protection of Human Rights and Fundamental Freedoms	N/A
IHRL	1961 European Social Charter	Preamble	X	X			X	X			X			X													X
IHRL	1996 Revised European Social Charter	V(E)	X	X			X	X			X			X	X		X			X						X	X			X
IHRL	1989 European Convention for the Prevention of Torture and Inhuman or Degrading Treatment or Punishment	N/A
IHRL	1995 Framework Convention for the Protection of National Minorities	4, 6		X		X							X		X											X
IHRL	1992 European Charter for Regional or Minority Languages	N/A
IHRL	1996 European Convention on the Exercise of Children’s Rights	N/A
IHRL	1997 Convention for the Protection of Human Rights and Dignity of the Human Being with regard to the Application of Biology and Medicine (Convention on Human Rights and Biomedicine)	11																													X
IHRL	1977 European Convention on the Legal Status of Migrant Workers	N/A
IHRL	1992 European Convention on the Participation of Foreigners in Public Life at the Local Level	N/A
IHRL	1997 European Convention on Nationality	5(1)	X	X	X	X					X			X
IHRL	2005 Convention on Action against Trafficking in Human Beings	3	X	X	X		X	X			X			X	X		X	X		X						X
IHRL	2007 Convention on the Protection of Children against Sexual Exploitation and Sexual Abuse	2	X	X	X		X	X			X	X		X	X		X	X	X	X						X				X
IHRL	2011 Convention on Preventing and Combating Violence against Women and Domestic Violence	4(3)	X	X	X		X	X		X	X	X		X	X	X	X	X	X	X	X		X			X				X
IRL	1951 Convention relating to the Status of Refugees	1, 33	X	X	X			X														X
IRL	1966 Bangkok Principles on Status and Treatment of Refugees	1	X	X	X	X		X		X				X								X
IRL	1984 Cartagena Declaration on Refugees	3	X	X	X			X														X
			57	57	49	30	25	49	16	8	34	2	4	31	26	6	26	11	4	27	1	2	2	1	2	7	3	1	1	3	1

## Sheet: IRL
Category	Instrument	Article(s)	Race	Religion	Nationality	Ethnic Origin	Social Origin	Political Opinion	Economic Status	Gender	Sex	Sexual Orientation	Culture	Colour	Language	Age	Birth	Property	Disability	Other Status	Citizenship	Membership of a Particular Social Group	Marital Status	Class	Descent	Association with a National Miority	National Extraction	Indigenous Origin	Education	Health	Genetic Heritage
IRL	1951 Convention relating to the Status of Refugees¹	1, 33	X	X	X			X														X
IRL	1966 Bangkok Principles on Status and Treatment of Refugees	1	X	X	X	X		X		X				X								X
IRL	1969 Convention on the Specific Aspects of Refugee Problems in Africa²	1	X	X	X			X														X
IRL	1984 Cartagena Declaration on Refugees	3	X	X	X			X														X
	¹ Excludes Art. 3 (the Convention shall be applied without discrimination as to race, religion, or country of origin)
	² Note this Convention only appears once in the Master list (under IHRL) for analytical purposes

## Sheet: IHRL
Category	Instrument	Article(s)	Race	Religion	Nationality	Ethnic Origin	Social Origin	Political Opinion	Economic Status	Gender	Sex	Sexual Orientation	Culture	Colour	Language	Age	Birth	Property	Disability	Other Status	Citizenship	Membership of a Particular Social Group	Marital Status	Class	Descent	Association with a National Miority	National Extraction	Indigenous Origin	Education	Health	Genetic Heritage
IHRL	1945 Charter of the United Nations	1(3), 13(b), 55(c), 76(c)	X	X							X				X
IHRL	1948 Universal Declaration for Human Rights	2	X	X	X		X	X			X			X	X		X	X		X
IHRL	1966 International Covenant on Civil and Political Rights	2(1), 4(1), 24(1), 26	X	X	X		X	X			X			X	X		X	X		X
IHRL	1966 International Covenant on Economic, Social and Cultural Rights	2(2)	X	X	X		X	X			X			X	X		X	X		X
IHRL	1966 International Convention on the Elimination of All Forms of Racial Discrimination	Preamble, 1(1)	X	X	X	X					X			X	X										X
IHRL	1984 Convention Against Torture and Other Cruel, Inhuman or Degrading Treatment or Punishment	N/A
IHRL	2006 Convention for the Protection of All Persons from Enforced Disappearance	13(7)	X	X	X	X		X			X											X
IHRL	1979 Convention on the Elimination of All Forms of Discrimination Against Women	N/A
IHRL	1989 Convention on the Rights of the Child	Preamble, 2(1)	X	X	X	X	X	X			X			X	X		X	X	X	X
IHRL	1990 Convention on the Protection of the Rights of All Migrant Workers and Members of their Families	1(1), 7	X	X	X	X	X	X	X		X			X	X	X	X	X		X			X
IHRL	2006 Convention on the Rights of Persons with Disabilities	Preamble (p)	X	X	X	X	X	X			X			X	X	X	X	X		X								X
IHRL	1958 Convention concerning Discrimination in Respect of Employment and Occupation	Preamble, 1(a)	X	X			X	X			X			X													X
IHRL	1948 Freedom of Association and Protection of the Right to Organise Convention (No. 87)	N/A
IHRL	1949 Right to Organise and Collective Bargaining Convention (No. 98)	N/A
IHRL	1930 Forced Labour Convention (No. 29)	N/A
IHRL	1957 Abolition of Forced Labour Convention (No. 105)	1	X	X	X		X
IHRL	1973 Minimum Age Convention (No. 138)	N/A
IHRL	1999 Worst Forms of Child Labour Convention (No. 182)	N/A
IHRL	1951 Equal Remuneration Convention (No. 100)	1									X
IHRL	1981 African Charter on Human and Peoples’ Rights (Banjul Charter)	Preamble, 2	X	X	X	X	X	X	X		X			X	X		X			X
IHRL	1969 Convention Governing the Specific Aspects of Refugee Problems	I(1), IV	X	X	X			X														X
IHRL	2003 Protocol to the African Charter on Human and People’s Rights on the Rights of Women in Africa	Preamble	X	X	X	X	X	X	X		X			X	X		X			X
IHRL	1990 African Charter on the Rights and Welfare of the Child	3	X	X	X	X	X	X	X		X			X	X		X			X
IHRL	2009 African Union Convention on the Protection and Assistance of Internally Displaced Persons in Africa	N/A
IHRL	1969 American Convention on Human Rights	1(1), 13(5), 22(8), 27(1)	X	X	X		X	X	X		X			X	X		X			X
IHRL	1988 Additional Protocol to the American Convention on Human Rights in the Area of Economic, Social and Cultural Rights	3	X	X	X		X	X	X		X			X	X		X			X
IHRL	1990 Protocol to the American Convention on Human Rights to Abolish the Death Penalty	N/A
IHRL	1985 Inter-American Convention to Prevent and Punish Torture	N/A
IHRL	1994 Inter-American Convention on Forced Disappearance	N/A
IHRL	1994 Inter-American Convention on the Prevention, Punishment and Eradication of Violence Against Women¹	Preamble	X	X		X			X				X			X								X					X
IHRL	1999 Inter-American Convention on the Elimination of All Forms of Discrimination against Persons with Disabilities	N/A
IHRL	1994 Arab Charter of Human Rights	2	X	X	X		X	X	X	X	X			X	X		X			X
IHRL	2012 ASEAN Human Rights Declaration	2	X	X	X		X	X	X	X					X	X	X		X	X
IHRL	2007 ASEAN Declaration on the Protection and Promotion of the Rights of Migrant Workers	N/A
IHRL	2013 ASEAN Declaration on the Elimination of Violence against Women and Elimination of Violence against Children	N/A
IHRL	1950 European Convention for the Protection of Human Rights and Fundamental Freedoms (European Convention of Human Rights)	14	X	X	X		X	X			X			X	X		X	X		X						X
IHRL	1952 Protocol 1 to the European Convention for Human Rights and Fundamental Freedoms	N/A
IHRL	1963 Protocol 4 to the European Convention for the Protection of Human Rights and Fundamental Freedoms	N/A
IHRL	1983 Protocol 6 to the European Convention for the Protection of Human Rights and Fundamental Freedoms	N/A
IHRL	1984 Protocol 7 to the European Convention for the Protection of Human Rights and Fundamental Freedoms	N/A
IHRL	1994 Protocol 11 to the European Convention for the Protection of Human Rights and Fundamental Freedoms	N/A
IHRL	2000 Protocol 12 to the European Convention for the Protection of Human Rights and Fundamental Freedoms	1	X	X	X		X	X			X			X	X		X	X		X						X
IHRL	2002 Protocol 13 to the European Convention for the Protection of Human Rights and Fundamental Freedoms	N/A
IHRL	2004 Protocol 14 to the European Convention for the Protection of Human Rights and Fundamental Freedoms	N/A
IHRL	2013 Protocol 15 to the European Convention for the Protection of Human Rights and Fundamental Freedoms²	N/A
IHRL	2013 Protocol 16 to the European Convention for the Protection of Human Rights and Fundamental Freedoms	N/A
IHRL	1961 European Social Charter	Preamble	X	X			X	X			X			X													X
IHRL	1996 Revised European Social Charter	V(E)	X	X			X	X			X			X	X		X			X						X	X			X
IHRL	1989 European Convention for the Prevention of Torture and Inhuman or Degrading Treatment or Punishment	N/A
IHRL	1995 Framework Convention for the Protection of National Minorities	4, 6		X		X							X		X											X
IHRL	1992 European Charter for Regional or Minority Languages	N/A
IHRL	1996 European Convention on the Exercise of Children’s Rights	N/A
IHRL	1997 Convention for the Protection of Human Rights and Dignity of the Human Being with regard to the Application of Biology and Medicine (Convention on Human Rights and Biomedicine)	11																													X
IHRL	1977 European Convention on the Legal Status of Migrant Workers	N/A
IHRL	1992 European Convention on the Participation of Foreigners in Public Life at the Local Level	N/A
IHRL	1997 European Convention on Nationality	5(1)	X	X	X	X					X			X
IHRL	2005 Convention on Action against Trafficking in Human Beings	3	X	X	X		X	X			X			X	X		X	X		X						X
IHRL	2007 Convention on the Protection of Children against Sexual Exploitation and Sexual Abuse	2	X	X	X		X	X			X	X		X	X		X	X	X	X						X				X
IHRL	2011 Convention on Preventing and Combating Violence against Women and Domestic Violence	4(3)	X	X	X		X	X		X	X	X		X	X	X	X	X	X	X	X		X			X				X
	¹ Excludes Art. 9 (Parties taking special account of womens' vulnerability due to their race, ethnic background, status as migrants, refugees or displaced persons, pregnancy, disabled, minor age, elderly, socioeconomically disadvantaged, affected by armed conflict, deprived of freedom)
	² Not yet in force

## Sheet: TCL
Category	Instrument	Article(s)	Race	Religion	Nationality	Ethnic Origin	Social Origin	Political Opinion	Economic Status	Gender	Sex	Sexual Orientation	Culture	Colour	Language	Age	Birth	Property	Disability	Other Status	Citizenship	Membership of a Particular Social Group	Marital Status	Class	Descent	Association with a National Miority	National Extraction	Indigenous Origin	Education	Health	Genetic Heritage
TCL	1979 International Convention Against the Taking of Hostages	9	X	X	X	X		X
TCL	1988 Convention for the Suppression of Unlawful Acts of Violence against the Safety of Maritime Navigation	N/A
TCL	1997 International Convention for the Suppression of Terrorist Bombings	12	X	X	X	X		X
TCL	1999 International Convention for the Suppression of the Financing of Terrorism	15	X	X	X	X		X
TCL	2005 International Convention for the Suppression of Acts of Nuclear Terrorism	16	X	X	X	X		X
TCL	2010 Protocol Supplementary to the Convention for the Suppression of Unlawful Seizure of Aircraft	XIII	X	X	X	X		X		X
TCL	2005 Protocol to the Convention for the Suppression of Unlawful Acts against the Safety of Maritime Navigation	10(3)	X	X	X	X		X		X
TCL	1988 United Nations Convention against Illicit Traffic in Narcotic Drugs and Psychotropic Substances	6(6)	X	X	X			X
TCL	2000 United Nations Convention against Transnational Organized Crime	14	X	X	X	X		X			X
TCL	2003 United Nations Convention against Corruption	15	X	X	X	X		X			X
TCL	2002 Inter-American Convention Against Terrorism	14	X	X	X	X		X
TCL	2005 Convention on the Prevention of Terrorism	21(1)	X	X	X	X		X
TCL	1999 Organization for African Unity, Convention on the Prevention and Combatting of Terrorism	N/A
TCL	1998 Arab Convention for the Suppression of Terrorism	N/A
TCL	1987 South Asian Association for Regional Cooperation, Regional Convention on Suppression of Terrorism	N/A
TCL	1970 Convention for the Suppression of Unlawful Seizure of Aircraft	N/A
TCL	1988 Protocol for the Suppression of Unlawful Acts of Violence at Airports Serving International Civil Aviation	N/A
TCL	2010 Convention on the Suppression of Unlawful Acts Relating to International Civil Aviation	14	X	X	X	X		X		X
TCL	1973 Convention on the Prevention and Punishment of Crimes Against Internationally Protected Persons, including Diplomatic Agents	N/A
TCL	1988 Protocol for the Suppression of Unlawful Acts against the Safety of Fixed Platforms Located on the Continental Shelf	N/A
TCL	1994 Convention on the Safety of United Nations and Associated Personnel	N/A
TCL	2000 Protocol to Prevent, Suppress and Punish Trafficking in Persons, Especially Women and Children, supplementing the United Nations Convention against Transnational Organized Crime¹	N/A
TCL	2000 Protocol against the Smuggling of Migrants by Land, Sea and Air, supplementing the United Nations Convention against Transnational Crime	N/A
TCL	2001 Protocol against the Illicit Manufacturing of and Trafficking in Firearms, their Parts and Components and Ammunition, supplementing the United Nations Convention against Transnational Organized Crime	N/A
TCL	1961 Single Convention on Narcotic Drugs	N/A
TCL	1971 United Nations Convention on Psychotropic Substances	N/A
TCL	1972 Protocol Amending the Single Convention on Narcotic Drugs	N/A
TCL	1956 Supplementary Convention on the Abolition of Slavery, the Slave Trade, and Institutions and Practices Similar to Slavery	N/A
TCL	1973 International Convention on the Suppression and Punishment of the Crime of Apartheid	Preamble	X	X	X						X			X	X
TCL	2000 Optional Protocol to the Convention on the Rights of the Child on the Sale of Children, Child Prostitution and Child Pornography	N/A
TCL	2001 Convention on Cybercrime (Budapest Convention)	N/A
TCL	2003 Additional Protocol to the Convention on Cybercrime, concerning the Criminalisation of Acts of a Racist and Xenophobic Nature Committed through Computer Systems	4(1), 5(1)	X	X	X	X								X											X
TCL	1982 United Nations Convention on the Law of the Sea	N/A
	¹ Excludes art. 14(2) (measures shall be consistent with internationally-recognized principles of non-discrimination)
	² Excludes art. 19(2) (measures shall be consistent with internationally-recognized principles of non-discrimination)

## Sheet: IHL
Category	Instrument	Article(s)	Race	Religion	Nationality	Ethnic Origin	Social Origin	Political Opinion	Economic Status	Gender	Sex	Sexual Orientation	Culture	Colour	Language	Age	Birth	Property	Disability	Other Status	Citizenship	Membership of a Particular Social Group	Marital Status	Class	Descent	Association with a National Miority	National Extraction	Indigenous Origin	Education	Health	Genetic Heritage
IHL	Geneva Convention for the Amelioration of the Condition of the Wounded and Sick in Armed Forces in the Field of 12 August 1949 (Geneva Convention I)	3, 12, 31	X	X	X			X	X		X			X			X			X
IHL	Geneva Convention for the Amelioration of the Condition of Wounded, Sick and Shipwrecked Members of Armed Forces at Sea of 12 August 1949 (Geneva Convention II)	3, 12	X	X	X			X	X		X			X			X			X
IHL	Geneva Convention Relative to the Treatment of Prisoners of War of 12 August 1949 (Geneva Convention III)	3, 16	X	X	X			X	X		X			X			X			X
IHL	Geneva Convention Relative to the Protection of Civilian Persons in Times of War of 12 August 1949 (Geneva Convention IV)	3, 13, 27	X	X	X			X	X		X			X			X			X
IHL	Protocol Additional to the Geneva Conventions of 12 August 1949, and Relating to the Protection of Victims of International Armed Conflicts (Protocol I) of 8 June 1977 (Additional Protocol 1)	9, 75	X	X	X		X	X	X		X			X	X		X			X
IHL	Protocol Additional to the Geneva Conventions of 12 August 1949, and Relating to the Protection of Victims of Non-International Armed Conflicts (Protocol II) of 8 June 1977 (Additional Protocol II)	2	X	X	X		X	X	X		X			X	X		X			X

## Sheet: ICL
Category	Instrument	Article(s)	Race	Religion	Nationality	Ethnic Origin	Social Origin	Political Opinion	Economic Status	Gender	Sex	Sexual Orientation	Culture	Colour	Language	Age	Birth	Property	Disability	Other Status	Citizenship	Membership of a Particular Social Group	Marital Status	Class	Descent	Association with a National Miority	National Extraction	Indigenous Origin	Education	Health	Genetic Heritage
ICL	1945 Charter of the International Military Tribunal (Nuremberg Charter)	6(c)	X	X				X
ICL	1946 Charter of the International Military Tribunal for the Far East (Tokyo Tribunal)	5(c)	X					X
ICL	1949 Convention on the Protection and Punishment of the Crime of Genocide (Genocide Convention)	2	X	X	X	X
ICL	1998 Rome Statute of the International Criminal Court (Rome Statute)	6, 7(1)(h), 21	X	X	X	X	X	X	X	X			X	X	X	X	X			X
ICL	1994 Statute of the International Criminal Tribunal for the Former Yugoslavia (ICTY Statute)	4(2), 5(h)	X	X	X	X		X
ICL	1994 Statute of the International Tribunal for Rwanda (ICTR Statute)	2, 3(h)	X	X	X	X		X
ICL	2002 Statute of the Special Court for Sierra Leone (SCSL Statute)	2(h)	X	X		X		X
ICL	2001 Law on the Establishment of the Extraordinary Chambers in the Courts of Cambodia for the Prosecution of Crimes Committed During the Period of Democratic Kampuchea (ECCC Statute)	4,5	X	X	X	X		X
ICL	2014 Protocol on Amendments to the Protocol on the Statute of the African Court of Justice and Human Rights¹	28(B), 28(C)	X	X	X	X		X		X			X							X
	¹ Not yet in force
